# Supplementary material for: Association between Chronic Obstructive Pulmonary Disease and Ménière’s Disease: A Nested Case—Control Study Using a National Health Screening Cohort
Source: MDPI journal article supplement (doi:10.3390/ijerph18094536), 2021-04-24
Supplement: s1 [file s1]

**Table S1** Subgroup analyses of odds ratios (95% confidence intervals) of chronic obstructive pulmonary disease for Meniere's disease according to obesity, smoking, alcohol consumption, total cholesterol, blood pressure, blood glucose, and Charlson comorbidity index.

| Characteristics                     | No. of Meniere’s disease/<br>No. of participants (%) | Odds ratios for Meniere’s disease |         |                  |         |
|-------------------------------------|------------------------------------------------------|-----------------------------------|---------|------------------|---------|
|                                     |                                                      | Model 1†                          | P-value | Model 2‡         | P-value |
| Obesity (Underweight, n = 975)      |                                                      |                                   |         |                  |         |
| COPD                                | 23/119 (19.3)                                        | 1.20 (0.72-1.99)                  | 0.485   | 1.03 (0.56-1.88) | 0.934   |
| Non-COPD                            | 129/856 (15.1)                                       | 1                                 |         | 1                |         |
| Obesity (Normal weight, n = 13,635) |                                                      |                                   |         |                  |         |
| COPD                                | 235/934 (25.2)                                       | 1.49 (1.27-1.74)                  | <0.001* | 1.26 (1.05-1.52) | 0.014*  |
| Non-COPD                            | 2,403/12,701 (18.9)                                  | 1                                 |         | 1                |         |
| Obesity (Overweight, n = 10,473)    |                                                      |                                   |         |                  |         |
| COPD                                | 166/628 (26.4)                                       | 1.41 (1.17-1.70)                  | <0.001* | 1.11 (0.89-1.39) | 0.340   |
| Non-COPD                            | 2,002/9,845 (20.3)                                   | 1                                 |         | 1                |         |
| Obesity (Obese, n = 13,587)         |                                                      |                                   |         |                  |         |
| COPD                                | 236/901 (26.2)                                       | 1.43 (1.22-1.67)                  | <0.001* | 1.16 (0.97-1.40) | 0.105   |

|                                                         |                     |                  |         |                  |        |
|---------------------------------------------------------|---------------------|------------------|---------|------------------|--------|
| Non-COPD                                                | 2,540/12,686 (20.0) | 1                |         | 1                |        |
| Smoking (Nonsmoker, n = 30,624)                         |                     |                  |         |                  |        |
| COPD                                                    | 499/1,917 (26.0)    | 1.42 (1.27-1.58) | <0.001* | 1.18 (1.04-1.33) | 0.011* |
| Non-COPD                                                | 5,750/28,707 (20.0) | 1                |         | 1                |        |
| Smoking (Past smoker and current smoker, n = 8,046)     |                     |                  |         |                  |        |
| COPD                                                    | 161/665 (24.2)      | 1.51 (1.25-1.83) | <0.001* | 1.18 (0.93-1.49) | 0.187  |
| Non-COPD                                                | 1,324/7,381 (17.9)  | 1                |         | 1                |        |
| Alcohol consumption (< 1 time a week, n = 28,128)       |                     |                  |         |                  |        |
| COPD                                                    | 503/1,964 (25.6)    | 1.36 (1.23-1.52) | <0.001* | 1.13 (0.99-1.28) | 0.064  |
| Non-COPD                                                | 5,299/26,164 (20.3) | 1                |         | 1                |        |
| Alcohol consumption ( $\geq$ 1 time a week, n = 10,542) |                     |                  |         |                  |        |
| COPD                                                    | 157/618 (25.4)      | 1.58 (1.31-1.92) | <0.001* | 1.34 (1.07-1.68) | 0.010* |
| Non-COPD                                                | 1,775/9,924 (17.9)  | 1                |         | 1                |        |
| Total cholesterol (< 200 mg/dL, n = 19,992)             |                     |                  |         |                  |        |
| COPD                                                    | 362/1,455 (24.9)    | 1.38 (1.21-1.57) | <0.001* | 1.12 (0.97-1.31) | 0.130  |
| Non-COPD                                                | 3,627/18,537 (19.6) | 1                |         | 1                |        |

|                                                                       |                     |                  |            |                  |        |
|-----------------------------------------------------------------------|---------------------|------------------|------------|------------------|--------|
| Total cholesterol ( $\geq 200$ to $< 240$ mg/dL, n = 13,186)          |                     |                  |            |                  |        |
| COPD                                                                  | 198/789 (25.1)      | 1.41 (1.19-1.67) | $<0.001^*$ | 1.24 (1.02-1.51) | 0.033* |
| Non-COPD                                                              | 2,411/12,397 (19.5) | 1                |            | 1                |        |
| Total cholesterol ( $\geq 240$ mg/dL, n = 5,492)                      |                     |                  |            |                  |        |
| COPD                                                                  | 100/338 (29.6)      | 1.69 (1.32-2.17) | $<0.001^*$ | 1.29 (0.96-1.73) | 0.086  |
| Non-COPD                                                              | 1,036/5,154 (20.1)  | 1                |            | 1                |        |
| Blood pressure (SBP $< 140$ mmHg and DBP $< 90$ mmHg, n = 28,878)     |                     |                  |            |                  |        |
| COPD                                                                  | 507/1,926 (26.3)    | 1.44 (1.29-1.60) | $<0.001^*$ | 1.17 (1.03-1.33) | 0.014* |
| Non-COPD                                                              | 5,409/26,952 (20.1) | 1                |            | 1                |        |
| Blood pressure (SBP $\geq 140$ mmHg or DBP $\geq 90$ mmHg, n = 9,792) |                     |                  |            |                  |        |
| COPD                                                                  | 153/656 (23.3)      | 1.35 (1.11-1.64) | 0.002*     | 1.21 (0.96-1.51) | 0.105  |
| Non-COPD                                                              | 1,665/9,136 (18.2)  | 1                |            | 1                |        |
| Fasting blood glucose ( $< 100$ mg/dL, n = 24,421)                    |                     |                  |            |                  |        |
| COPD                                                                  | 398/1,599 (24.9)    | 1.35 (1.20-1.52) | $<0.001^*$ | 1.16 (1.01-1.34) | 0.036* |
| Non-COPD                                                              | 4,499/22,822 (19.7) | 1                |            | 1                |        |
| Fasting blood glucose ( $\geq 100$ mg/dL, n = 14,249)                 |                     |                  |            |                  |        |

|                                       |                     |                  |         |                  |        |
|---------------------------------------|---------------------|------------------|---------|------------------|--------|
| COPD                                  | 262/983 (26.7)      | 1.55 (1.34-1.81) | <0.001* | 1.20 (1.01-1.44) | 0.043* |
| Non-COPD                              | 2,575/13,266 (19.4) | 1                |         | 1                |        |
| CCI score (score = 0, n = 25,975)     |                     |                  |         |                  |        |
| COPD                                  | 263/1,110 (23.7)    | 1.36 (1.18-1.57) | <0.001* | 1.12 (0.95-1.32) | 0.194  |
| Non-COPD                              | 4,613/24,865 (18.6) | 1                |         | 1                |        |
| CCI score (score = 1, n = 5,844)      |                     |                  |         |                  |        |
| COPD                                  | 174/642 (27.1)      | 1.30 (1.07-1.57) | 0.007*  | 1.26 (1.00-1.58) | 0.047* |
| Non-COPD                              | 1,238/5,202 (23.8)  | 1                |         | 1                |        |
| CCI score (score $\geq$ 2, n = 6,851) |                     |                  |         |                  |        |
| COPD                                  | 223/830 (26.9)      | 1.49 (1.26-1.77) | <0.001* | 1.21 (0.98-1.48) | 0.072  |
| Non-COPD                              | 1,223/6,021 (20.3)  | 1                |         | 1                |        |

Abbreviations: CCI, Charlson comorbidity index; COPD, chronic obstructive pulmonary disease; DBP, diastolic blood pressure; SBP, systolic blood pressure

\* Logistic regression, Significance at  $P < 0.05$

† A model 1 was adjusted for age, sex, income, and region of residence.

‡ A model 2 was adjusted for age, sex, income, and region of residence, obesity, smoking, alcohol consumption, CCI scores, total cholesterol, SBP, DBP, fasting blood glucose, benign paroxysmal vertigo, vestibular neuronitis, other peripheral vertigo, and asthma
